# Supplementary material for: Estrogen Receptor Beta (ERβ) Mediated-CyclinD1 Degradation via Autophagy Plays an Anti-Proliferation Role in Colon Cells
Source: PubMed Central journal article supplement — Int J Biol Sci. 2019 Mar 10;15(5):942–52. doi: 10.7150/ijbs.30930 (PMC6535788; doi:10.7150/ijbs.30930), 2019-03-10

## **Estrogen receptor beta (ER $\beta$ ) mediated-CyclinD1 degradation via autophagy plays an anti-proliferation role in colon cells**

### **Supplementary Materials and Methods**

#### **Cell culture and treatments**

The normal human colon mucosal epithelial cell line (NCM460), human colon adenocarcinoma cell line (HCT116) and mouse embryonic fibroblasts (MEFs) were cultivated in DMEM medium supplemented with 10% (v/v) Fetal Bovine Serum (FBS, Biological Industries) and 1% penicillin/streptomycin (Gibco, USA). All cells were routinely cultured in a humidified atmosphere of 5% CO<sub>2</sub> at 37°C incubator.

#### **Western blotting**

Cellular protein was extracted with RIPA buffer (Beyotime, China) supplemented with complete protease inhibitor mixture (Roche, Mannheim). Subsequently, western blot analysis was performed as the previous description [1]. The primary antibodies used include: ER $\beta$  (SAB2702145), LC3B (L7543), and  $\beta$ -actin (A1978) from Sigma-Aldrich; mTOR (#2972), Phospho-mTOR (#5536), ATG7 (#8558), PTEN (#9552), AKT (#9272), Phospho-Akt (#4060), Beclin1 (#3738), Phospho-Beclin1 (#84966), ULK1 (#4776) and Phospho-ULK1 (#14202) from Cell Signaling technology (San Diego, USA), CyclinD1 (ab134175) from Abcam Biotechnology (Cambridge, MA, USA); Caspase-3 (19677-1-AP), CyclinD1 (60186-1-Ig), p62/SQSTM1 (18420-1-AP) and ER $\beta$  (14007-1-AP) from Proteintech (Wuhan, China); LAMP2 (A14017) and BNIP3 (A5683) from Abclonal (Wuhan, China);

peroxidase-conjugated immunopure goat anti-rabbit and anti-mouse IgG (HL) from Abclonal. Enhanced chemiluminescence (ECL) horseradish peroxidase (HRP) was used to visualize protein bands. NIH Image J software was used to measure the intensity of the bands.

## References

- [1] N. Zheng, P. Yuan, C. Li, et al., Luteolin Reduces BACE1 Expression through NF- $\kappa$ B and through Estrogen Receptor Mediated Pathways in HEK293 and SH-SY5Y Cells, *J Alzheimers Dis* 45 (2015) 659-671.

## Supplementary Figure Legends

**Figure S1. Autophagy level in normal and colorectal cancer. (A)** Boxplot showing relative expression of SQSTM1 in TCGA samples (normal vs primary tumor). **(B)** Boxplot showing relative expression of SQSTM1 in TCGA samples. (normal vs stage 1-4 colorectal cancer patients). **(C)** Boxplot showing relative expression of MAP1LC3B in TCGA samples (normal vs primary tumor). **(D)** Boxplot showing relative expression of MAP1LC3B in TCGA samples. (normal vs stage 1-4 colorectal cancer patients). **(E)** Western blot analysis of p62 and LC3-II expression in NCM460 and HCT116. Bar graph (right) indicates the relative ratio of LC3-II and p62 to  $\beta$ -actin of triplicate experiments in NCM460 and HCT116. Western blot was quantified using ImageJ software. Data shown are mean  $\pm$  S.D. of three independent experiments. (\*,  $P < 0.05$ ; \*\*,  $P < 0.01$ ; \*\*\*,  $P < 0.001$ ).

**Figure S2. mTOR-related signals in HCT116 cells. (A)** Western blot analysis of mTOR and p-mTOR expression in NCM460 and HCT116. Bar graph (right)

indicates the relative ratio of mTOR and p-mTOR to  $\beta$ -actin of triplicate experiments in NCM460 and HCT116. **(B)** Overexpression of ER $\beta$  and ATG7 in HCT116 cells for 48 h reduced the level of p-mTOR and p-AKT and increased the expression of LC3-II, PTEN, p-Beclin1, and p-ULK1. Bar graph (right) indicates the relative ratio of p-mTOR/m-TOR, p-ULK1/ULK1, p-Beclin1/Beclin1, p-AKT/AKT and PTEN/ $\beta$ -actin of triplicate experiments in HCT116. Western blot was quantified using ImageJ software. Data shown are mean  $\pm$  S.D. of three independent experiments. (\*,  $P < 0.05$ ; \*\*,  $P < 0.01$ ).

## Supplementary Figure 1

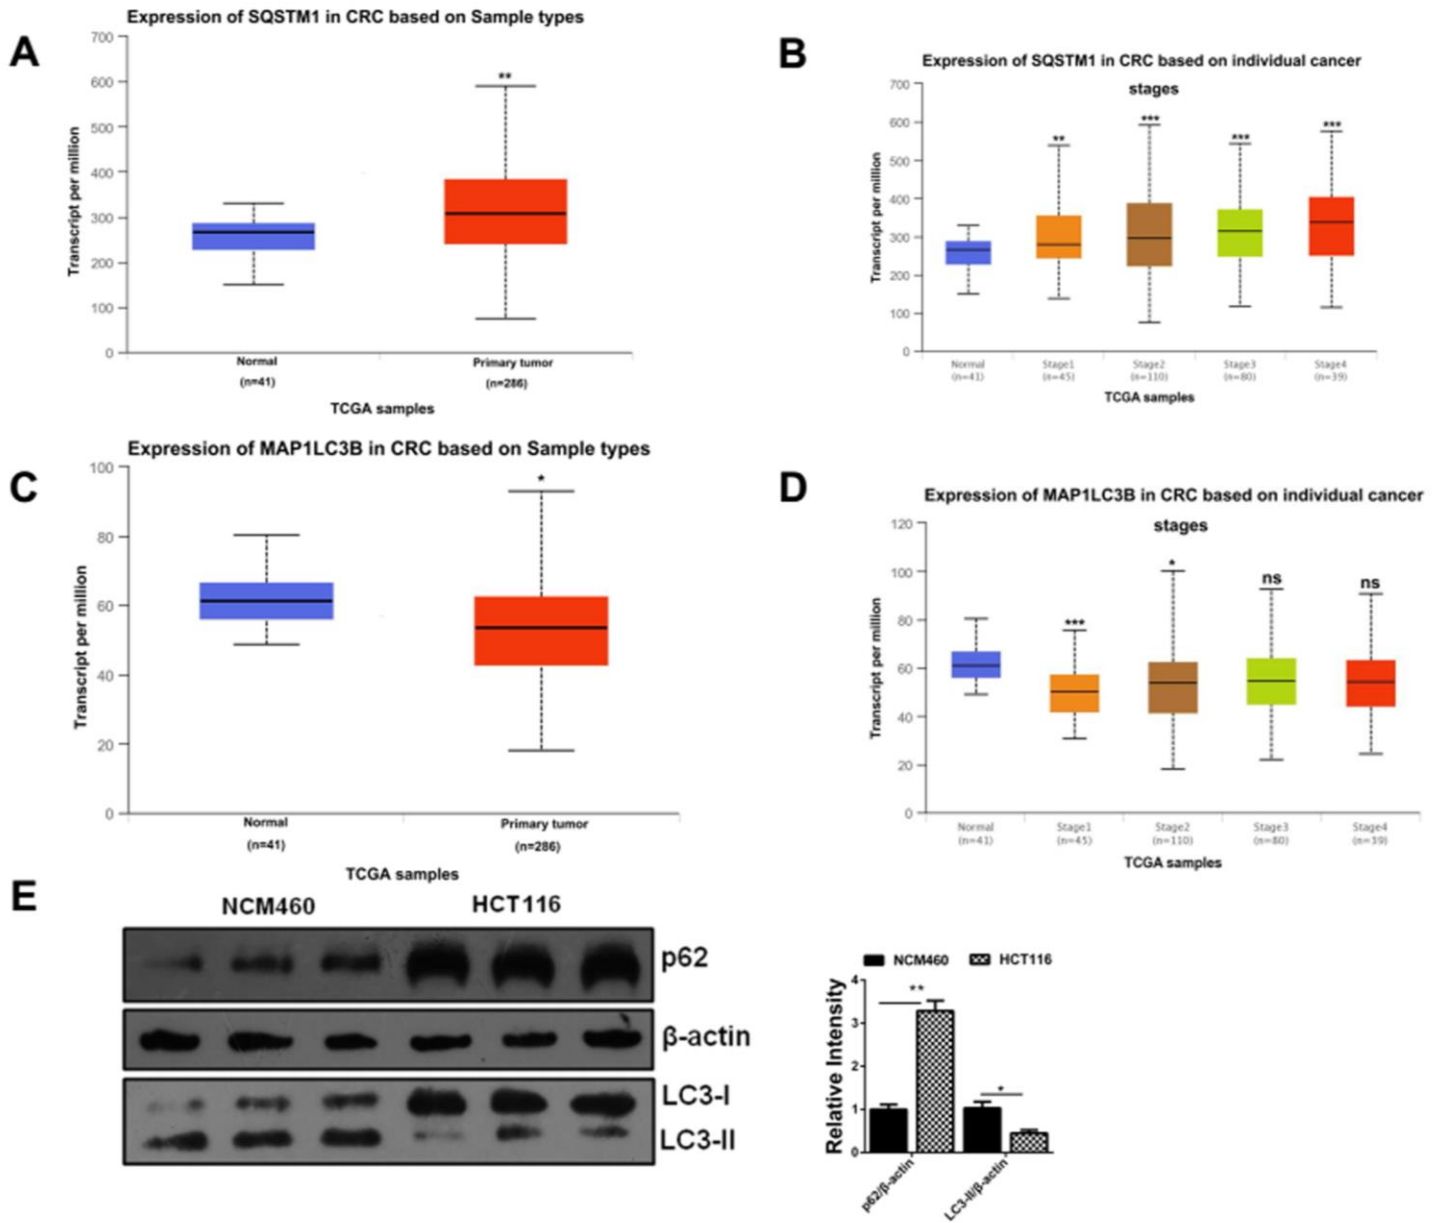

## Supplementary Figure 2

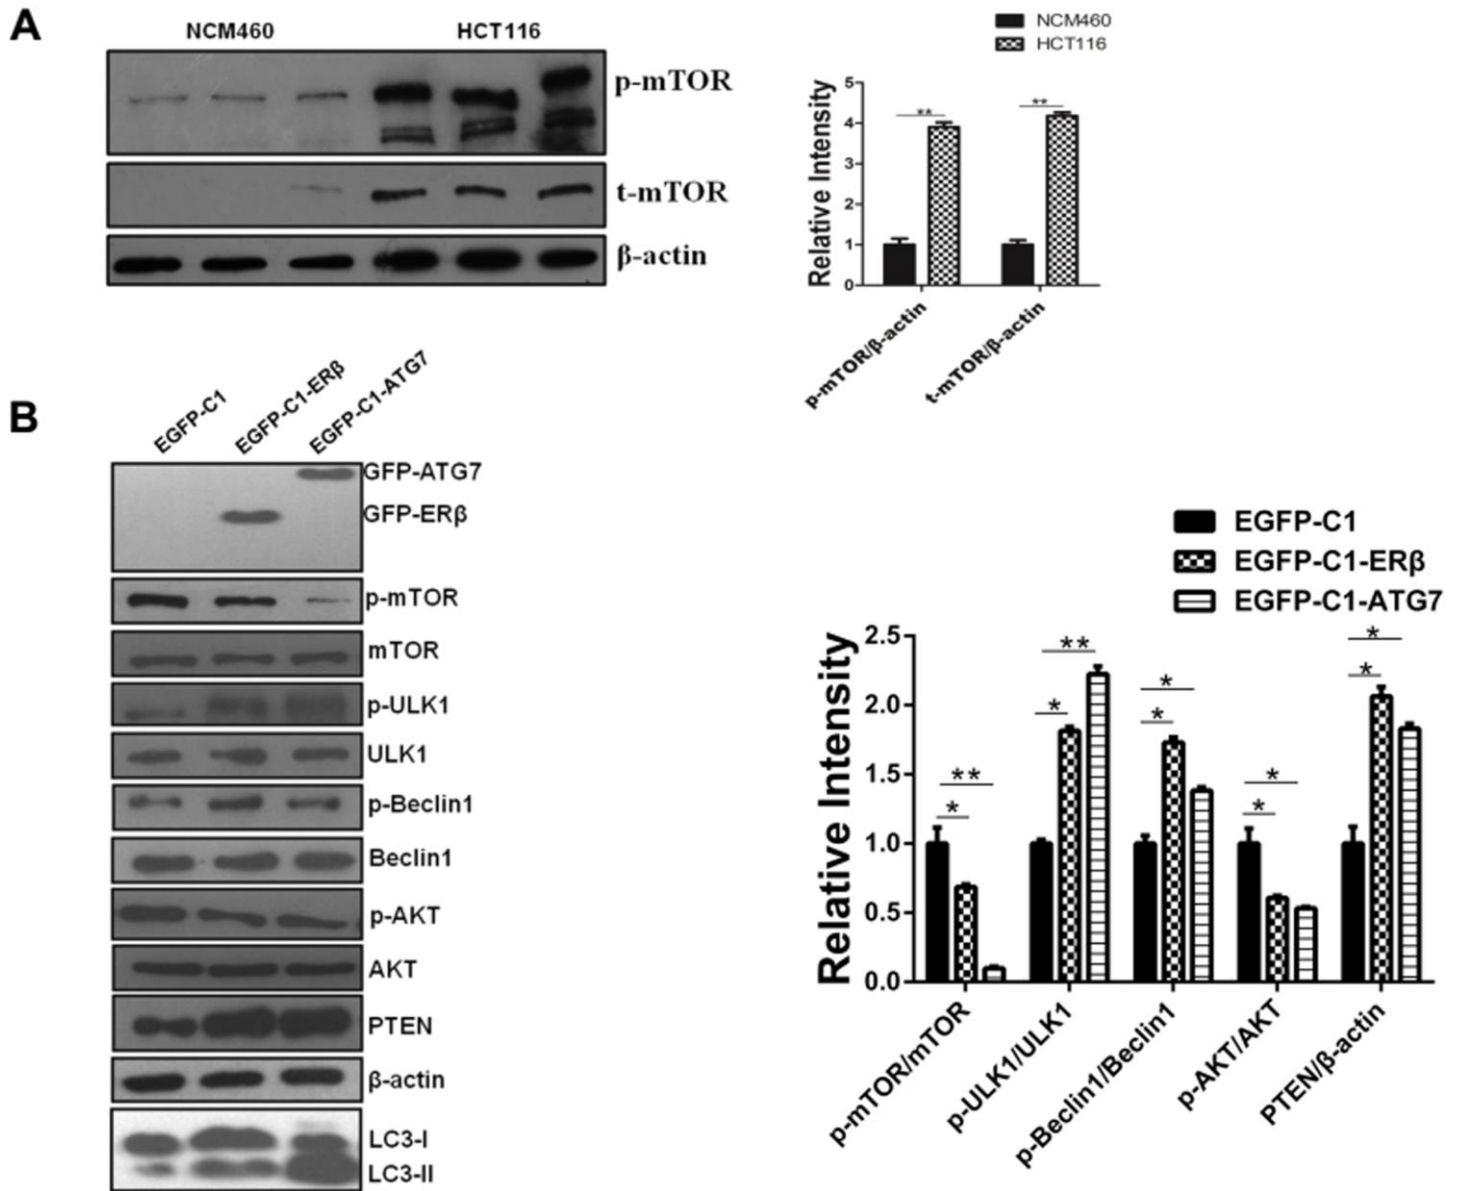

Supplement: ijbsv15p0942s1.pdf [file ijbsv15p0942s1.pdf]
